# Supplementary material
Source: bioRxiv or medRxiv preprint supplement (https://medrxiv.org/highwire/filestream/72567/field_highwire_adjunct_files/0/2020.02.22.20026757-1.pdf)
Supplement: Supplementary file [file 2020.02.22.20026757-1.pdf]

1 **SUPPLEMENTAL MATERIAL**

2 **Polygenic modulation of lipoprotein(a)-associated cardiovascular risk.**

3

4 **Brief title:** Genetic modulation of lipoprotein(a)-associated cardiovascular risk.

5

6 Mark Trinder<sup>a,b</sup>, MSc, Liam R. Brunham<sup>a,b,c,d</sup>, MD, PhD.

7

8 <sup>a</sup> Centre for Heart Lung Innovation, University of British Columbia, Vancouver, BC, Canada.

9 <sup>b</sup> Experimental Medicine Program, University of British Columbia, Vancouver, British  
10 Columbia, Canada

11 <sup>c</sup> Department of Medicine, University of British Columbia, Vancouver, British Columbia,  
12 Canada

13 <sup>d</sup> Department of Medical Genetics, University of British Columbia, Vancouver, British  
14 Columbia, Canada

15 **SUPPLEMENTAL METHODS**

16 ***Biochemical measurements.***

17           The detailed description of the serum biochemistry analyses have been described  
18 ([http://biobank.ndph.ox.ac.uk/showcase/showcase/docs/serum\\_biochemistry.pdf](http://biobank.ndph.ox.ac.uk/showcase/showcase/docs/serum_biochemistry.pdf) and  
19 [http://biobank.ndph.ox.ac.uk/showcase/showcase/docs/serum\\_hb1ac.pdf](http://biobank.ndph.ox.ac.uk/showcase/showcase/docs/serum_hb1ac.pdf)). All serum  
20 biochemistry results described were performed using the Beckman Coulter AU5800 platform  
21 (Beckman Coulter (UK), Ltd) other than hemoglobin A1c, which was performed using Bio-Rad  
22 Variant II Turbo analysers (Bio-Rad Laboratories, Inc.). The general details for each assay are  
23 displayed in Online Only Table 1. Results for serum biochemistry are reported for samples  
24 obtained at the time of study enrolment unless otherwise stated.

25 ***Definition of cardiovascular events.***

26           A detailed description of the UK Biobank’s algorithm for identifying an individual’s first  
27 myocardial infarction or stroke event have been described (myocardial infarction:  
28 [http://biobank.ndph.ox.ac.uk/showcase/showcase/docs/alg\\_outcome\\_mi.pdf](http://biobank.ndph.ox.ac.uk/showcase/showcase/docs/alg_outcome_mi.pdf); stroke:  
29 [http://biobank.ndph.ox.ac.uk/showcase/showcase/docs/alg\\_outcome\\_stroke.pdf](http://biobank.ndph.ox.ac.uk/showcase/showcase/docs/alg_outcome_stroke.pdf)).

30 **SUPPLEMENTAL TABLES**31 **Supplemental Table 1. Serum biochemistry assay details.** HDL-C: high-density lipoprotein

32 cholesterol; LDL-C: low-density lipoprotein cholesterol.

| <b>Serum assay</b> | <b>Assay Manufacturer</b>  | <b>Analytical Platform</b>         | <b>Analysis Methodology</b>            | <b>Reported Units</b> | <b>Manufacturer's Analytical Range</b> |
|--------------------|----------------------------|------------------------------------|----------------------------------------|-----------------------|----------------------------------------|
| Total cholesterol  | Beckman Coulter (UK), Ltd  | Beckman Coulter AU5800             | Enzymatic                              | mmol/L                | 0.5 - 18                               |
| Direct LDL-C       | Beckman Coulter (UK), Ltd  | Beckman Coulter AU5800             | Enzymatic Selective Protection         | mmol/L                | 0.26 -10.3                             |
| Triglycerides      | Beckman Coulter (UK), Ltd  | Beckman Coulter AU5800             | Enzymatic                              | mmol/L                | 0.1 - 11.3                             |
| HDL-C              | Beckman Coulter (UK), Ltd  | Beckman Coulter AU5800             | Enzyme Immuno-inhibition               | mmol/L                | 0.05 - 4.65                            |
| Lipoprotein(a)     | Randox Bioscience, UK      | Beckman Coulter AU5800             | Immuno-turbidimetric                   | nmol/L                | 5.76 - 189                             |
| Hemoglobin A1c     | Bio-Rad Laboratories, Inc. | Bio-Rad Variant II Turbo analysers | High Performance Liquid Chromatography | mmol/mol              | 15 - 184                               |
| C-reactive protein | Beckman Coulter (UK), Ltd  | Beckman Coulter AU5800             | Immuno-turbidimetric                   | mg/L                  | 0.08 - 80                              |

33

34 **Supplemental Table 2.** Phenotype codes used for determining the prevalence of peripheral  
35 vascular disease and aortic stenosis.

| <b>Cardiovascular Phenotype</b> | <b>Self-Reported Non-Cancer Illnesses</b>                                          | <b>International Classification of Diseases Codes</b>                                                                                      |
|---------------------------------|------------------------------------------------------------------------------------|--------------------------------------------------------------------------------------------------------------------------------------------|
| Peripheral vascular disease     | <ul style="list-style-type: none"><li>• 1067 peripheral vascular disease</li></ul> | <ul style="list-style-type: none"><li>• I73 Other peripheral vascular diseases</li></ul>                                                   |
| Aortic Stenosis                 | <ul style="list-style-type: none"><li>• 1490 aortic stenosis</li></ul>             | <ul style="list-style-type: none"><li>• I35.0 Aortic (valve) stenosis</li><li>• I35.2 Aortic (valve) stenosis with insufficiency</li></ul> |

36

37 **Supplemental Table 3. Enrollment characteristics and cardiovascular history of the study group stratified by quintiles of**  
38 **coronary artery disease genomic risk score percentile.** Coronary artery disease genomic risk score percentiles were calculated with  
39 the inclusion of genetic loci within and around the *LPA* gene. High-density lipoprotein cholesterol (HDL-C), interquartile range (IQR),  
40 low-density lipoprotein cholesterol (LDL-C) standard deviation (SD).

| Characteristic              | Measurement         | Quintiles of Coronary Artery Disease Genomic Risk Score Percentile |                         |                         |                         |                         | p       |
|-----------------------------|---------------------|--------------------------------------------------------------------|-------------------------|-------------------------|-------------------------|-------------------------|---------|
|                             |                     | ≤20                                                                | 20-40                   | 40-60                   | 60-80                   | 80-100                  |         |
| n                           | no.                 | 81778                                                              | 81779                   | 81779                   | 81779                   | 81781                   | n/a     |
| Age                         | mean (SD)           | 56.9 (8.0)                                                         | 56.9 (8.0)              | 56.9 (8.0)              | 57.0 (8.0)              | 56.9 (8.0)              | 0.12    |
| Female sex                  | no. (%)             | 44285 (54.2)                                                       | 44109 (53.9)            | 44113 (53.9)            | 44330 (54.2)            | 44245 (54.1)            | 0.74    |
| Hypertension                | no. (%) /<br>n      | 19479 (23.9) /<br>81654                                            | 21165 (25.9) /<br>81650 | 22242 (27.2) /<br>81652 | 23224 (28.4) /<br>81655 | 24778 (30.3) /<br>81645 | <0.0001 |
| Severe hypercholesterolemia | no. (%) /<br>n      | 4740 (6.1) /<br>77849                                              | 5768 (7.4) /<br>77872   | 6427 (8.3) /<br>77799   | 6978 (9.0) /<br>77844   | 8065 (10.4) /<br>77794  | <0.0001 |
| Diabetes mellitus           | no. (%) /<br>n      | 3524 (4.3) /<br>81610                                              | 3662 (4.5) /<br>81580   | 3885 (4.8) /<br>81590   | 4211 (5.2) /<br>81613   | 4491 (5.5) /<br>81610   | <0.0001 |
| Obesity                     | no. (%) /<br>n      | 18564 (22.8) /<br>81540                                            | 18987 (23.3) /<br>81520 | 20044 (24.6) /<br>81532 | 20218 (24.8) /<br>81512 | 21066 (25.8) /<br>81496 | <0.0001 |
| Current smoker              | no. (%) /<br>n      | 8088 (9.9) /<br>81523                                              | 8110 (10.0) /<br>81505  | 8359 (10.3) /<br>81480  | 8323 (10.2) /<br>81486  | 8440 (10.4) /<br>81467  | 0.009   |
| Total cholesterol (mmol/L)  | median (IQR) /<br>n | 5.67 (1.47) /<br>77989                                             | 5.76 (1.51) /<br>78020  | 5.81 (1.54) /<br>77941  | 5.85 (1.57) /<br>77982  | 5.93 (1.63) /<br>77943  | <0.0001 |
| LDL-C (mmol/L)              | median (IQR) /<br>n | 3.50 (1.11) /<br>77849                                             | 3.58 (1.14) /<br>77872  | 3.62 (1.16) /<br>77799  | 3.66 (1.17) /<br>77844  | 3.72 (1.21) /<br>77794  | <0.0001 |
| Triglycerides (mmol/L)      | median (IQR) /<br>n | 1.46 (1.08) /<br>77940                                             | 1.49 (1.10) /<br>77954  | 1.50 (1.11) /<br>77873  | 1.51 (1.11) /<br>77916  | 1.52 (1.13) /<br>77884  | <0.0001 |
| HDL-C (mmol/L)              | median (IQR) /<br>n | 1.42 (0.51) /<br>71302                                             | 1.41 (0.50) /<br>71454  | 1.40 (0.50) /<br>71355  | 1.40 (0.50) /<br>71307  | 1.38 (0.50) /<br>71422  | <0.0001 |
| Lipoprotein(a) (nmol/L)     | median (IQR) /<br>n | 16.2 (32.4) /<br>63900                                             | 17.87 (38.3) /<br>63514 | 19.2 (45.2) /<br>63344  | 22.2 (62.1) /<br>62058  | 34.1 (101.0) /<br>57204 | <0.0001 |
| HbA1c (mmol/mol)            | median (IQR) /<br>n | 35.1 (4.8) /<br>77928                                              | 35.1 (4.9) /<br>77880   | 35.2 (5.0) /<br>77919   | 35.2 (5.1) /<br>77966   | 35.3 (5.1) /<br>78078   | <0.0001 |
| C-reactive protein (mg/L)   | median (IQR) /<br>n | 1.30 (2.05) /<br>77848                                             | 1.32 (2.06) /<br>77843  | 1.34 (2.09) /<br>77767  | 1.35 (2.13) /<br>77819  | 1.36 (2.16) /<br>77759  | <0.0001 |

42 **Supplemental Table 4. Enrollment characteristics and cardiovascular history of the study group stratified by quintiles of**  
43 **coronary artery disease genomic risk score percentile.** Coronary artery disease genomic risk score percentiles were calculated after  
44 excluding genetic loci within and around the *LPA* gene. High-density lipoprotein cholesterol (HDL-C), interquartile range (IQR), low-  
45 density lipoprotein cholesterol (LDL-C) standard deviation (SD).

| Characteristic              | Measurement         | Quintiles of Coronary Artery Disease Genomic Risk Score Percentile (without <i>LPA</i> ) |                         |                         |                         |                         | p       |
|-----------------------------|---------------------|------------------------------------------------------------------------------------------|-------------------------|-------------------------|-------------------------|-------------------------|---------|
|                             |                     | ≤20                                                                                      | 20-40                   | 40-60                   | 60-80                   | 80-100                  |         |
| n                           | no.                 | 81777                                                                                    | 81780                   | 81779                   | 81779                   | 81781                   | n/a     |
| Age                         | mean (SD)           | 56.9 (8.0)                                                                               | 56.9 (8.0)              | 56.9 (8.0)              | 56.9 (8.0)              | 56.9 (8.0)              | 0.5     |
| Female sex                  | no. (%)             | 44237 (54.1)                                                                             | 44237 (54.1)            | 44151 (54.0)            | 44286 (54.2)            | 44171 (54.0)            | 0.96    |
| Hypertension                | no. (%) /<br>n      | 19531 (23.9) /<br>81655                                                                  | 21088 (25.8) /<br>81644 | 22119 (27.1) /<br>81652 | 23394 (28.6) /<br>81655 | 24756 (30.3) /<br>81650 | <0.0001 |
| Severe hypercholesterolemia | no. (%) /<br>n      | 4841 (6.2) /<br>77814                                                                    | 5913 (7.6) /<br>77847   | 6384 (8.2) /<br>77826   | 7003 (9.0) /<br>77849   | 7837 (10.1) /<br>77822  | <0.0001 |
| Diabetes mellitus           | no. (%) /<br>n      | 3564 (4.4) /<br>81608                                                                    | 3662 (4.5) /<br>81584   | 3864 (4.7) /<br>81605   | 4192 (5.1) /<br>81592   | 4491 (5.5) /<br>81614   | <0.0001 |
| Obesity                     | no. (%) /<br>n      | 18571 (22.8) /<br>81539                                                                  | 19079 (23.4) /<br>81536 | 19826 (24.3) /<br>81515 | 20197 (24.8) /<br>81506 | 21206 (26.0) /<br>81504 | <0.0001 |
| Current smoker              | no. (%) /<br>n      | 8062 (9.9) /<br>81525                                                                    | 8174 (10.0) /<br>81496  | 8308 (10.2) /<br>81491  | 8381 (10.3) /<br>81488  | 8395 (10.3) /<br>81461  | 0.02    |
| Total cholesterol (mmol/L)  | median (IQR) /<br>n | 5.68 (1.48) /<br>77964                                                                   | 5.77 (1.52) /<br>77988  | 5.81 (1.54) /<br>77974  | 5.86 (1.58) /<br>77977  | 5.90 (1.61) /<br>77972  | <0.0001 |
| LDL-C (mmol/L)              | median (IQR) /<br>n | 3.51 (1.11) /<br>77814                                                                   | 3.59 (1.14) /<br>77847  | 3.62 (1.16) /<br>77826  | 3.66 (1.18) /<br>77849  | 3.70 (1.20) /<br>77822  | <0.0001 |
| Triglycerides (mmol/L)      | median (IQR) /<br>n | 1.45 (1.08) /<br>77914                                                                   | 1.48 (1.10) /<br>77916  | 1.50 (1.11) /<br>77912  | 1.52 (1.11) /<br>77908  | 1.54 (1.13) /<br>77917  | <0.0001 |
| HDL-C (mmol/L)              | median (IQR) /<br>n | 1.42 (0.51) /<br>71306                                                                   | 1.41 (0.50) /<br>71428  | 1.40 (0.50) /<br>71294  | 1.40 (0.50) /<br>71372  | 1.38 (0.49) /<br>71440  | <0.0001 |
| Lipoprotein(a) (nmol/L)     | median (IQR) /<br>n | 19.8 (51.68) /<br>62054                                                                  | 20.1 (51.1) /<br>62039  | 20.1 (50.6) /<br>62133  | 20.2 (50.7) /<br>62101  | 20.4 (50.2) /<br>61693  | 0.26    |
| HbA1c (mmol/mol)            | median (IQR) /<br>n | 35.1 (4.9) /<br>77887                                                                    | 35.1 (4.9) /<br>77934   | 35.1 (5.0) /<br>77913   | 35.2 (5.2) /<br>78002   | 35.3 (5.2) /<br>78035   | <0.0001 |
| C-reactive protein (mg/L)   | median (IQR) /<br>n | 1.30 (2.05) /<br>77818                                                                   | 1.32 (2.06) /<br>77838  | 1.33 (2.09) /<br>77777  | 1.35 (2.12) /<br>77801  | 1.36 (2.16) /<br>77802  | <0.0001 |

47 **Supplemental Table 5. Prevalence of myocardial infarction versus deciles of coronary artery disease genomic risk score for**  
 48 **individuals with and without elevated lipoprotein(a).** Coronary artery disease genomic risk score percentiles were calculated with  
 49 the inclusion and exclusion of genetic loci within and around the *LPA* gene.

| Lipoprotein(a)<br>Strata       | Genomic<br>Risk Score | Deciles of Coronary Artery Disease Genomic Risk Score Percentile (events / n [%]) |                           |                           |                           |                           |                           |                           |                           |                           |                           |
|--------------------------------|-----------------------|-----------------------------------------------------------------------------------|---------------------------|---------------------------|---------------------------|---------------------------|---------------------------|---------------------------|---------------------------|---------------------------|---------------------------|
|                                |                       | ≤10                                                                               | 10-20                     | 20-30                     | 30-40                     | 40-50                     | 50-60                     | 60-70                     | 70-80                     | 80-90                     | 90-100                    |
| Non-elevated<br>(< 120 nmol/L) | with <i>LPA</i>       | 663 /<br>30118<br>[2.20]                                                          | 744 /<br>29598<br>[2.51]  | 832 /<br>29208<br>[2.85]  | 945 /<br>28694<br>[3.29]  | 969 /<br>28441<br>[3.41]  | 1111 /<br>28007<br>[3.97] | 1115 /<br>27158<br>[4.11] | 1238 /<br>26080<br>[4.75] | 1329 /<br>24566<br>[5.41] | 1372 /<br>19882<br>[6.90] |
| Elevated<br>(≥ 120 nmol/L)     | with <i>LPA</i>       | 55 /<br>1836<br>[3]                                                               | 73 /<br>2348<br>[3.11]    | 90 /<br>2597<br>[3.47]    | 114 /<br>3015<br>[3.78]   | 150 /<br>3186<br>[4.71]   | 186 /<br>3710<br>[5.01]   | 207 /<br>4119<br>[5.03]   | 244 /<br>4701<br>[5.19]   | 345 /<br>5530<br>[6.24]   | 558 /<br>7226<br>[7.72]   |
| Overall                        | with <i>LPA</i>       | 933 /<br>40890<br>[2.28]                                                          | 1065 /<br>40888<br>[2.60] | 1208 /<br>40888<br>[2.95] | 1398 /<br>40891<br>[3.42] | 1486 /<br>40890<br>[3.63] | 1708 /<br>40889<br>[4.18] | 1798 /<br>40889<br>[4.40] | 2016 /<br>40890<br>[4.93] | 2344 /<br>40890<br>[5.73] | 3085 /<br>40891<br>[7.54] |
| Non-elevated<br>(< 120 nmol/L) | without<br><i>LPA</i> | 575 /<br>27230<br>[2.11]                                                          | 710 /<br>27185<br>[2.61]  | 742 /<br>27166<br>[2.73]  | 844 /<br>27097<br>[3.11]  | 892 /<br>27208<br>[3.28]  | 1032 /<br>27302<br>[3.78] | 1132 /<br>27249<br>[4.15] | 1224 /<br>27177<br>[4.50] | 1381 /<br>27132<br>[5.09] | 1786 /<br>27006<br>[6.61] |
| Elevated<br>(≥ 120 nmol/L)     | without<br><i>LPA</i> | 112 /<br>3759<br>[2.98]                                                           | 132 /<br>3880<br>[3.40]   | 157 /<br>3846<br>[4.08]   | 178 /<br>3930<br>[4.53]   | 181 /<br>3845<br>[4.71]   | 196 /<br>3778<br>[5.19]   | 227 /<br>3810<br>[5.96]   | 247 /<br>3865<br>[6.39]   | 259 /<br>3810<br>[6.80]   | 333 /<br>3745<br>[8.89]   |
| Overall                        | without<br><i>LPA</i> | 953 /<br>40890<br>[2.33]                                                          | 1165 /<br>40887<br>[2.85] | 1249 /<br>40889<br>[3.05] | 1418 /<br>40891<br>[3.47] | 1506 /<br>40889<br>[3.68] | 1687 /<br>40890<br>[4.13] | 1851 /<br>40890<br>[4.53] | 2020 /<br>40889<br>[4.94] | 2257 /<br>40890<br>[5.52] | 2935 /<br>40891<br>[7.18] |

50

51 **Supplemental Table 6. Prevalence of peripheral vascular disease versus deciles of coronary artery disease genomic risk score**  
52 **for individuals with and without elevated lipoprotein(a).** Coronary artery disease genomic risk score percentiles were calculated  
53 with the inclusion and exclusion of genetic loci within and around the *LPA* gene.

| Lipoprotein(a)<br>Strata       | Genomic<br>Risk<br>Score | Deciles of Coronary Artery Disease Genomic Risk Score Percentile (events / n [%]) |                          |                          |                          |                          |                          |                          |                          |                          |                          |
|--------------------------------|--------------------------|-----------------------------------------------------------------------------------|--------------------------|--------------------------|--------------------------|--------------------------|--------------------------|--------------------------|--------------------------|--------------------------|--------------------------|
|                                |                          | ≤10                                                                               | 10-20                    | 20-30                    | 30-40                    | 40-50                    | 50-60                    | 60-70                    | 70-80                    | 80-90                    | 90-100                   |
| Non-elevated<br>(< 120 nmol/L) | with <i>LPA</i>          | 299 /<br>30118<br>[0.99]                                                          | 323 /<br>29598<br>[1.09] | 327 /<br>29208<br>[1.12] | 316 /<br>28694<br>[1.1]  | 307 /<br>28441<br>[1.08] | 332 /<br>28007<br>[1.19] | 333 /<br>27158<br>[1.23] | 301 /<br>26080<br>[1.15] | 307 /<br>24566<br>[1.25] | 316 /<br>19882<br>[1.59] |
| Elevated<br>(≥ 120 nmol/L)     | with <i>LPA</i>          | 17 /<br>1836<br>[0.93]                                                            | 31 /<br>2348<br>[1.32]   | 33 /<br>2597<br>[1.27]   | 39 /<br>3015<br>[1.29]   | 41 /<br>3186<br>[1.29]   | 46 /<br>3710<br>[1.24]   | 61 /<br>4119<br>[1.48]   | 69 /<br>4701<br>[1.47]   | 101 /<br>5530<br>[1.83]  | 121 /<br>7226<br>[1.67]  |
| Overall                        | with <i>LPA</i>          | 415 /<br>40890<br>[1.01]                                                          | 456 /<br>40888<br>[1.12] | 486 /<br>40888<br>[1.19] | 450 /<br>40891<br>[1.1]  | 487 /<br>40890<br>[1.19] | 510 /<br>40889<br>[1.25] | 532 /<br>40889<br>[1.30] | 534 /<br>40890<br>[1.31] | 590 /<br>40890<br>[1.44] | 720 /<br>40891<br>[1.76] |
| Non-elevated<br>(< 120 nmol/L) | without<br><i>LPA</i>    | 280 /<br>27230<br>[1.03]                                                          | 284 /<br>27185<br>[1.04] | 294 /<br>27166<br>[1.08] | 299 /<br>27097<br>[1.1]  | 301 /<br>27208<br>[1.11] | 304 /<br>27302<br>[1.11] | 342 /<br>27249<br>[1.26] | 361 /<br>27177<br>[1.33] | 296 /<br>27132<br>[1.09] | 400 /<br>27006<br>[1.48] |
| Elevated<br>(≥ 120 nmol/L)     | without<br><i>LPA</i>    | 45 /<br>3759<br>[1.20]                                                            | 45 /<br>3880<br>[1.16]   | 45 /<br>3846<br>[1.17]   | 59 /<br>3930<br>[1.50]   | 44 /<br>3845<br>[1.14]   | 59 /<br>3778<br>[1.56]   | 59 /<br>3810<br>[1.55]   | 55 /<br>3865<br>[1.42]   | 75 /<br>3810<br>[1.97]   | 73 /<br>3745<br>[1.95]   |
| Overall                        | without<br><i>LPA</i>    | 445 /<br>40890<br>[1.09]                                                          | 458 /<br>40887<br>[1.12] | 479 /<br>40889<br>[1.17] | 501 /<br>40891<br>[1.23] | 468 /<br>40889<br>[1.14] | 503 /<br>40890<br>[1.23] | 550 /<br>40890<br>[1.35] | 575 /<br>40889<br>[1.41] | 542 /<br>40890<br>[1.33] | 659 /<br>40891<br>[1.61] |

54



55 **Supplemental Table 7. Prevalence of aortic stenosis versus deciles of coronary artery disease genomic risk score for individuals**  
56 **with and without elevated lipoprotein(a).** Coronary artery disease genomic risk score percentiles were calculated with the inclusion  
57 and exclusion of genetic loci within and around the *LPA* gene.

| Lipoprotein(a)<br>Strata          | Genomic<br>Risk<br>Score | Deciles of Coronary Artery Disease Genomic Risk Score Percentile (events / n [%]) |                          |                          |                          |                          |                          |                          |                          |                          |                          |
|-----------------------------------|--------------------------|-----------------------------------------------------------------------------------|--------------------------|--------------------------|--------------------------|--------------------------|--------------------------|--------------------------|--------------------------|--------------------------|--------------------------|
|                                   |                          | ≤10                                                                               | 20-30                    | 20-30                    | 30-40                    | 40-50                    | 50-60                    | 60-70                    | 70-80                    | 80-90                    | 90-100                   |
| Non-elevated<br>( $< 120$ nmol/L) | with <i>LPA</i>          | 116 /<br>30118<br>[0.39]                                                          | 144 /<br>29598<br>[0.49] | 159 /<br>29208<br>[0.54] | 154 /<br>28694<br>[0.54] | 141 /<br>28441<br>[0.5]  | 140 /<br>28007<br>[0.5]  | 165 /<br>27158<br>[0.61] | 158 /<br>26080<br>[0.61] | 139 /<br>24566<br>[0.57] | 137 /<br>19882<br>[0.69] |
| Elevated<br>( $\geq 120$ nmol/L)  | with <i>LPA</i>          | 9 /<br>1836<br>[0.49]                                                             | 18 /<br>2348<br>[0.77]   | 14 /<br>2597<br>[0.54]   | 21 /<br>3015<br>[0.70]   | 23 /<br>3186<br>[0.72]   | 25 /<br>3710<br>[0.67]   | 40 /<br>4119<br>[0.97]   | 56 /<br>4701<br>[1.19]   | 56 /<br>5530<br>[1.01]   | 55 /<br>7226<br>[0.76]   |
| Overall                           | with <i>LPA</i>          | 166 /<br>40890<br>[0.41]                                                          | 218 /<br>40888<br>[0.53] | 217 /<br>40888<br>[0.53] | 229 /<br>40891<br>[0.56] | 227 /<br>40890<br>[0.56] | 245 /<br>40889<br>[0.60] | 268 /<br>40889<br>[0.66] | 308 /<br>40890<br>[0.75] | 289 /<br>40890<br>[0.71] | 339 /<br>40891<br>[0.83] |
| Non-elevated<br>( $< 120$ nmol/L) | without<br><i>LPA</i>    | 112 /<br>27230<br>[0.41]                                                          | 138 /<br>27185<br>[0.51] | 127 /<br>27166<br>[0.47] | 160 /<br>27097<br>[0.59] | 135 /<br>27208<br>[0.5]  | 132 /<br>27302<br>[0.48] | 150 /<br>27249<br>[0.55] | 169 /<br>27177<br>[0.62] | 165 /<br>27132<br>[0.61] | 165 /<br>27006<br>[0.61] |
| Elevated<br>( $\geq 120$ nmol/L)  | without<br><i>LPA</i>    | 25 /<br>3759<br>[0.67]                                                            | 27 /<br>3880<br>[0.70]   | 26 /<br>3846<br>[0.68]   | 36 /<br>3930<br>[0.92]   | 34 /<br>3845<br>[0.88]   | 38 /<br>3778<br>[1.01]   | 31 /<br>3810<br>[0.81]   | 44 /<br>3865<br>[1.14]   | 29 /<br>3810<br>[0.76]   | 27 /<br>3745<br>[0.72]   |
| Overall                           | without<br><i>LPA</i>    | 191 /<br>40890<br>[0.47]                                                          | 230 /<br>40887<br>[0.56] | 224 /<br>40889<br>[0.55] | 276 /<br>40891<br>[0.67] | 227 /<br>40889<br>[0.56] | 239 /<br>40890<br>[0.58] | 273 /<br>40890<br>[0.67] | 283 /<br>40889<br>[0.69] | 278 /<br>40890<br>[0.68] | 285 /<br>40891<br>[0.70] |

58

59 **Supplemental Table 8. Prevalence of ischemic stroke versus deciles of coronary artery disease genomic risk score for**  
60 **individuals with and without elevated lipoprotein(a).** Coronary artery disease genomic risk score percentiles were calculated with  
61 the inclusion and exclusion of genetic loci within and around the *LPA* gene.

| Lipoprotein(a) Strata       | Genomic Risk Score | Deciles of Coronary Artery Disease Genomic Risk Score Percentile (events / n [%]) |                    |                    |                    |                    |                    |                    |                    |                    |                    |
|-----------------------------|--------------------|-----------------------------------------------------------------------------------|--------------------|--------------------|--------------------|--------------------|--------------------|--------------------|--------------------|--------------------|--------------------|
|                             |                    | ≤10                                                                               | 20-30              | 20-30              | 30-40              | 40-50              | 50-60              | 60-70              | 70-80              | 80-90              | 90-100             |
| Non-elevated (< 120 nmol/L) | with <i>LPA</i>    | 319 / 30118 [1.06]                                                                | 298 / 29598 [1.01] | 324 / 29208 [1.11] | 305 / 28694 [1.06] | 343 / 28441 [1.21] | 356 / 28007 [1.27] | 342 / 27158 [1.26] | 295 / 26080 [1.13] | 299 / 24566 [1.22] | 302 / 19882 [1.52] |
| Elevated (≥ 120 nmol/L)     | with <i>LPA</i>    | 26 / 1836 [1.42]                                                                  | 21 / 2348 [0.89]   | 31 / 2597 [1.19]   | 50 / 3015 [1.66]   | 40 / 3186 [1.26]   | 55 / 3710 [1.48]   | 62 / 4119 [1.51]   | 72 / 4701 [1.53]   | 78 / 5530 [1.41]   | 95 / 7226 [1.31]   |
| Overall                     | with <i>LPA</i>    | 431 / 40890 [1.05]                                                                | 439 / 40888 [1.07] | 475 / 40888 [1.16] | 471 / 40891 [1.15] | 493 / 40890 [1.21] | 539 / 40889 [1.32] | 534 / 40889 [1.31] | 501 / 40890 [1.23] | 524 / 40890 [1.28] | 640 / 40891 [1.57] |
| Non-elevated (< 120 nmol/L) | without <i>LPA</i> | 290 / 27230 [1.07]                                                                | 294 / 27185 [1.08] | 267 / 27166 [0.98] | 292 / 27097 [1.08] | 308 / 27208 [1.13] | 339 / 27302 [1.24] | 333 / 27249 [1.22] | 346 / 27177 [1.27] | 336 / 27132 [1.24] | 378 / 27006 [1.4]  |
| Elevated (≥ 120 nmol/L)     | without <i>LPA</i> | 45 / 3759 [1.20]                                                                  | 55 / 3880 [1.42]   | 50 / 3846 [1.30]   | 57 / 3930 [1.45]   | 61 / 3845 [1.59]   | 48 / 3778 [1.27]   | 49 / 3810 [1.29]   | 62 / 3865 [1.6]    | 62 / 3810 [1.63]   | 41 / 3745 [1.09]   |
| Overall                     | without <i>LPA</i> | 427 / 40890 [1.04]                                                                | 486 / 40887 [1.19] | 463 / 40889 [1.13] | 475 / 40891 [1.16] | 493 / 40889 [1.21] | 515 / 40890 [1.26] | 529 / 40890 [1.29] | 546 / 40889 [1.34] | 536 / 40890 [1.31] | 577 / 40891 [1.41] |

62

63 **SUPPLEMENTAL FIGURES**

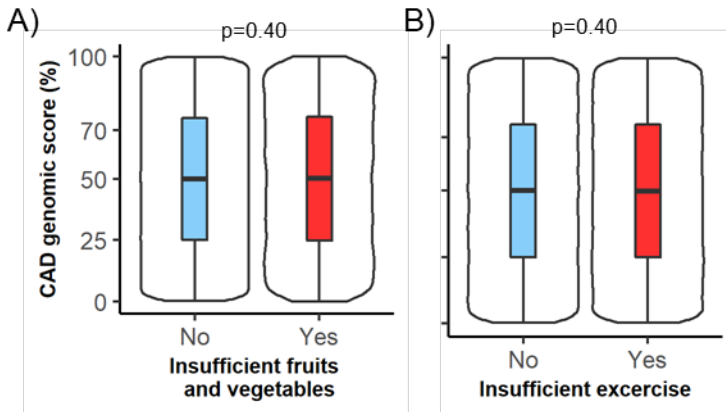

64

65 **Supplemental Figure 1. Genomic scores for coronary artery disease do not associate with**

66 **fruit and vegetable intake and exercise.** The distribution of coronary artery disease genomic

67 score percentiles are displayed for (A) insufficient intake of fruits and vegetables and (B)

68 insufficient exercise assessed at study enrollment. Boxplots display the median and interquartile

69 range. The boxplot's whiskers show the range and the accompanying density distribution.

A)

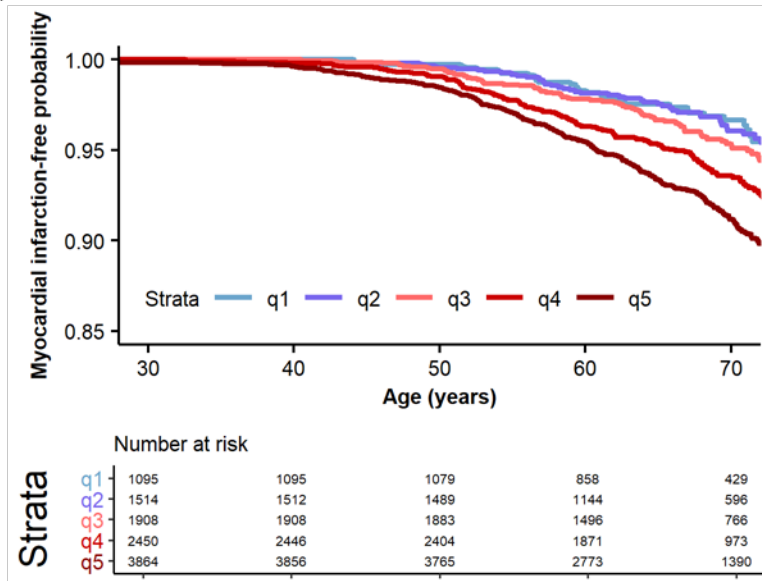

B)

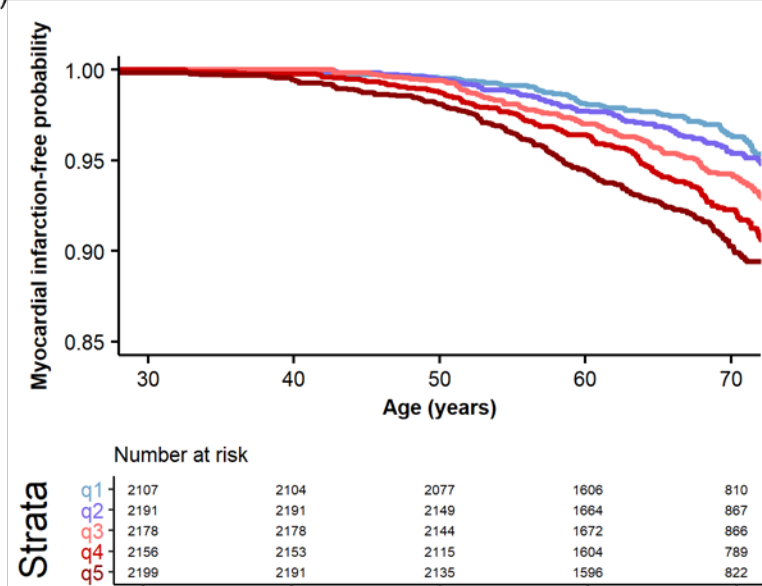

70

71 **Supplemental Figure 2. Coronary artery disease genomic risk scores are a modifier of risk**  
 72 **of myocardial infarction for individuals with extremely elevated lipoprotein(a).** Time-to-  
 73 first-event analyses are displayed for risk of myocardial infarction events stratified by quintiles  
 74 of coronary artery disease genomic risk score percentile among individuals with extremely  
 75 elevated lipoprotein(a) ( $\geq 168$  nmol/L,  $\approx 70$  mg/dL) calculated (A) with and (B) without genetic  
 76 variants in proximity to the *LPA* gene.

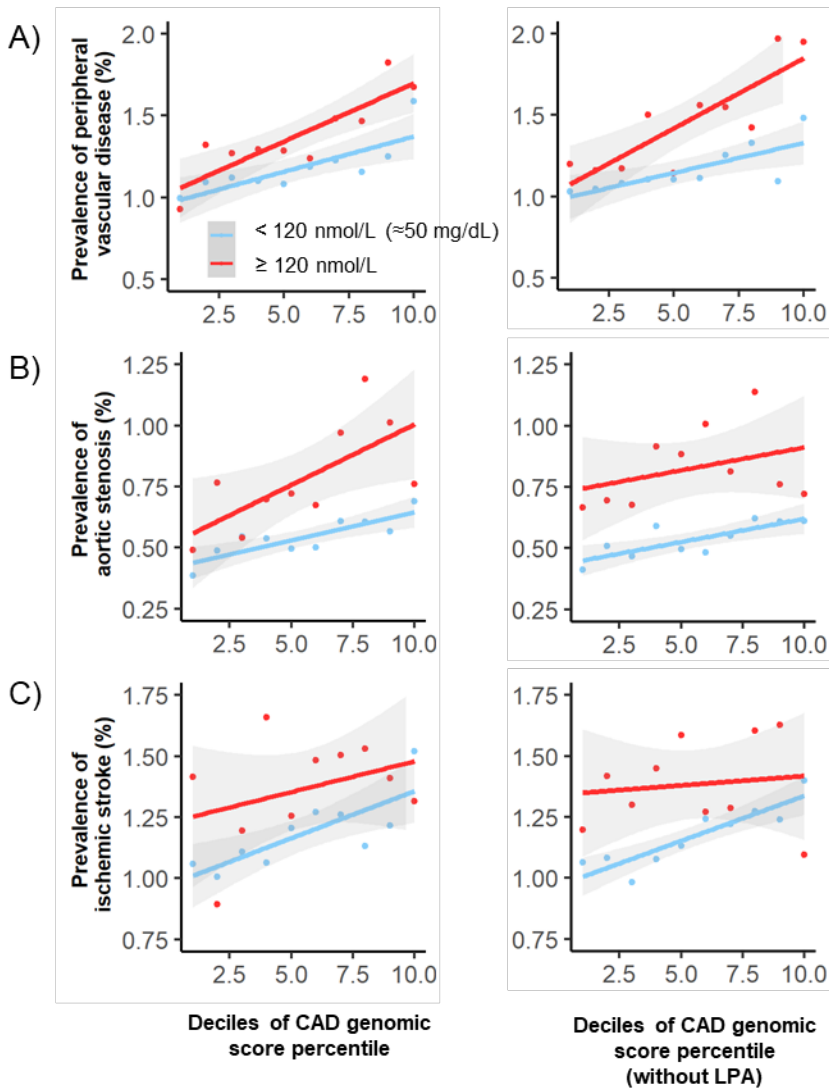

77

78 **Supplemental Figure 3.** The prevalence of (A) peripheral vascular disease, (B) aortic stenosis,  
 79 and (C) ischemic stroke is displayed for each decile of coronary artery disease genomic risk  
 80 score percentile calculated with and without genetic variants in proximity to the *LPA* gene. Solid  
 81 lines depict linear regression analyses and gray shading indicate the associated 95% confidence  
 82 interval stratified by non-elevated versus elevated lipoprotein(a) levels.
